# Supplementary material for: Aurora A depletion reveals centrosome-independent polarization mechanism in Caenorhabditis elegans
Source: eLife journal article supplement (doi:10.7554/elife.44552), 2019-02-25
Supplement: supp [file elife-44552-supp-v1.zip]

Archive with 20 entries (20 files):
- elife_poa_e44552_Video_6.mov
- elife_poa_e44552_Video_3.avi
- elife_poa_e44552_Figure_2_figure_supplement_1.pdf
- elife_poa_e44552_Video_7.mov
- elife_poa_e44552_Video_8.avi
- elife_poa_e44552_Video_4.avi
- elife_poa_e44552_Figure_1_figure_supplement_2.pdf
- elife_poa_e44552_Video_1.avi
- elife_poa_e44552_Video_9.avi
- elife_poa_e44552_Supplementary_File_1.docx
- elife_poa_e44552_Video_2.avi
- elife_poa_e44552_Figure_3_figure_supplement_1.pdf
- elife_poa_e44552_Supplementary_File_2.docx
- elife_poa_e44552_Transparent_Reporting_File.pdf
- elife_poa_e44552_Video_5.avi
- elife_poa_e44552_Figure_6_figure_supplement_1.pdf
- elife_poa_e44552_Figure_1_figure_supplement_1.pdf
- elife_poa_e44552_Figure_5_figure_supplement_1.pdf
- elife_poa_e44552_Figure_4_figure_supplement_1.pdf
- elife_poa_e44552_Figure_7_figure_supplement_1.pdf
