# Supplementary material for: Aurora A depletion reveals centrosome-independent polarization mechanism in Caenorhabditis elegans
Source: eLife journal article supplement (doi:10.7554/elife.44552), 2019-02-25

# Figure 7- Figure Supplement 8

**A**

distance of centrosomes to  
(future) PAR-2 domain

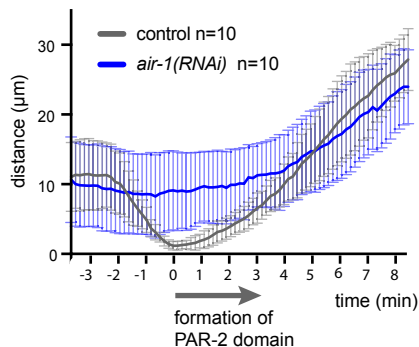

**B**

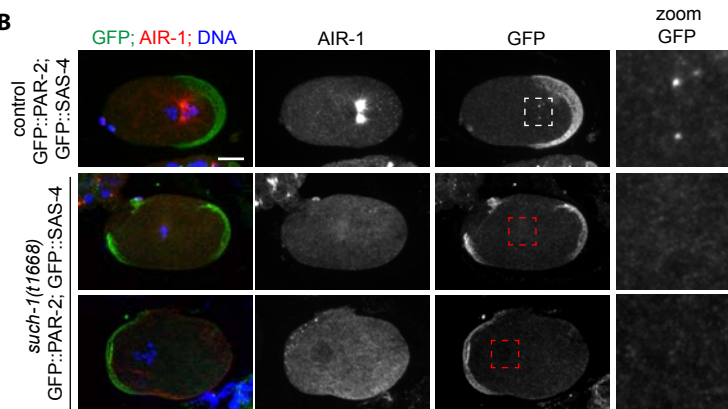

**C**

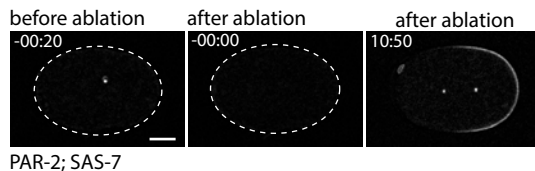

**D**

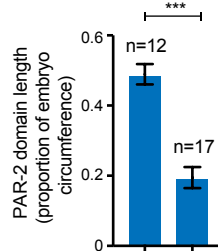

|                     |   |   |
|---------------------|---|---|
| <i>air-1(RNAi)</i>  | + | + |
| <i>spd-2(RNAi)</i>  |   | + |
| $\delta$ GFP::SAS-7 |   | + |
| GBP::mCh::AIR-1     | + | + |

**E**

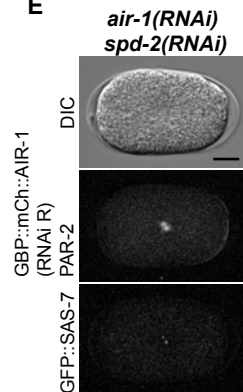

Supplement: supp [file elife-44552-supp-v1.zip › elife_poa_e44552_Figure_7_figure_supplement_1.pdf]
