# Supplementary figures and images for: Aurora A depletion reveals centrosome-independent polarization mechanism in Caenorhabditis elegans
Source: eLife journal article supplement (doi:10.7554/elife.44552), 2019-02-25

# Figure 6- Figure Supplement 7

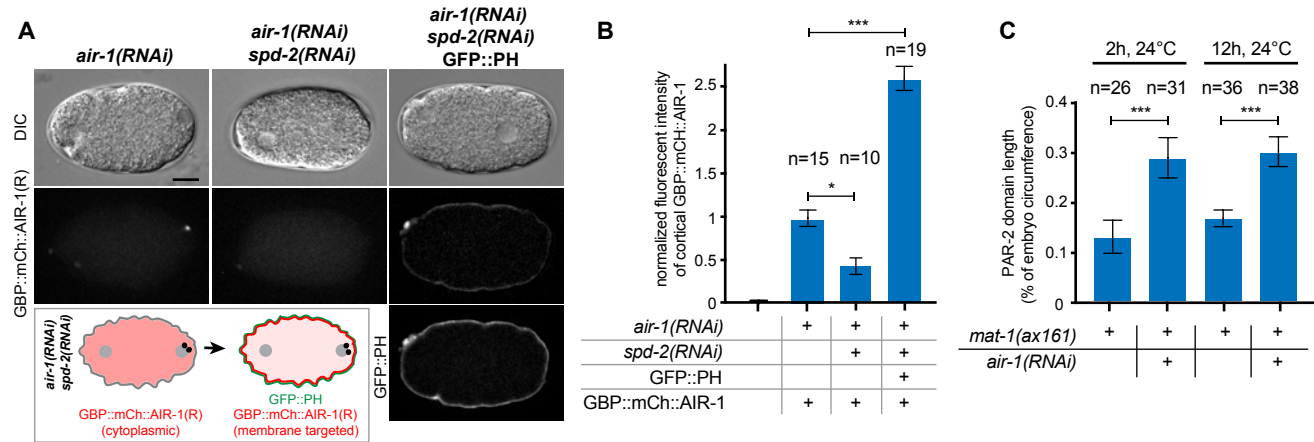

Supplement: supp [file elife-44552-supp-v1.zip]

Figure 2- Figure Supplement 3

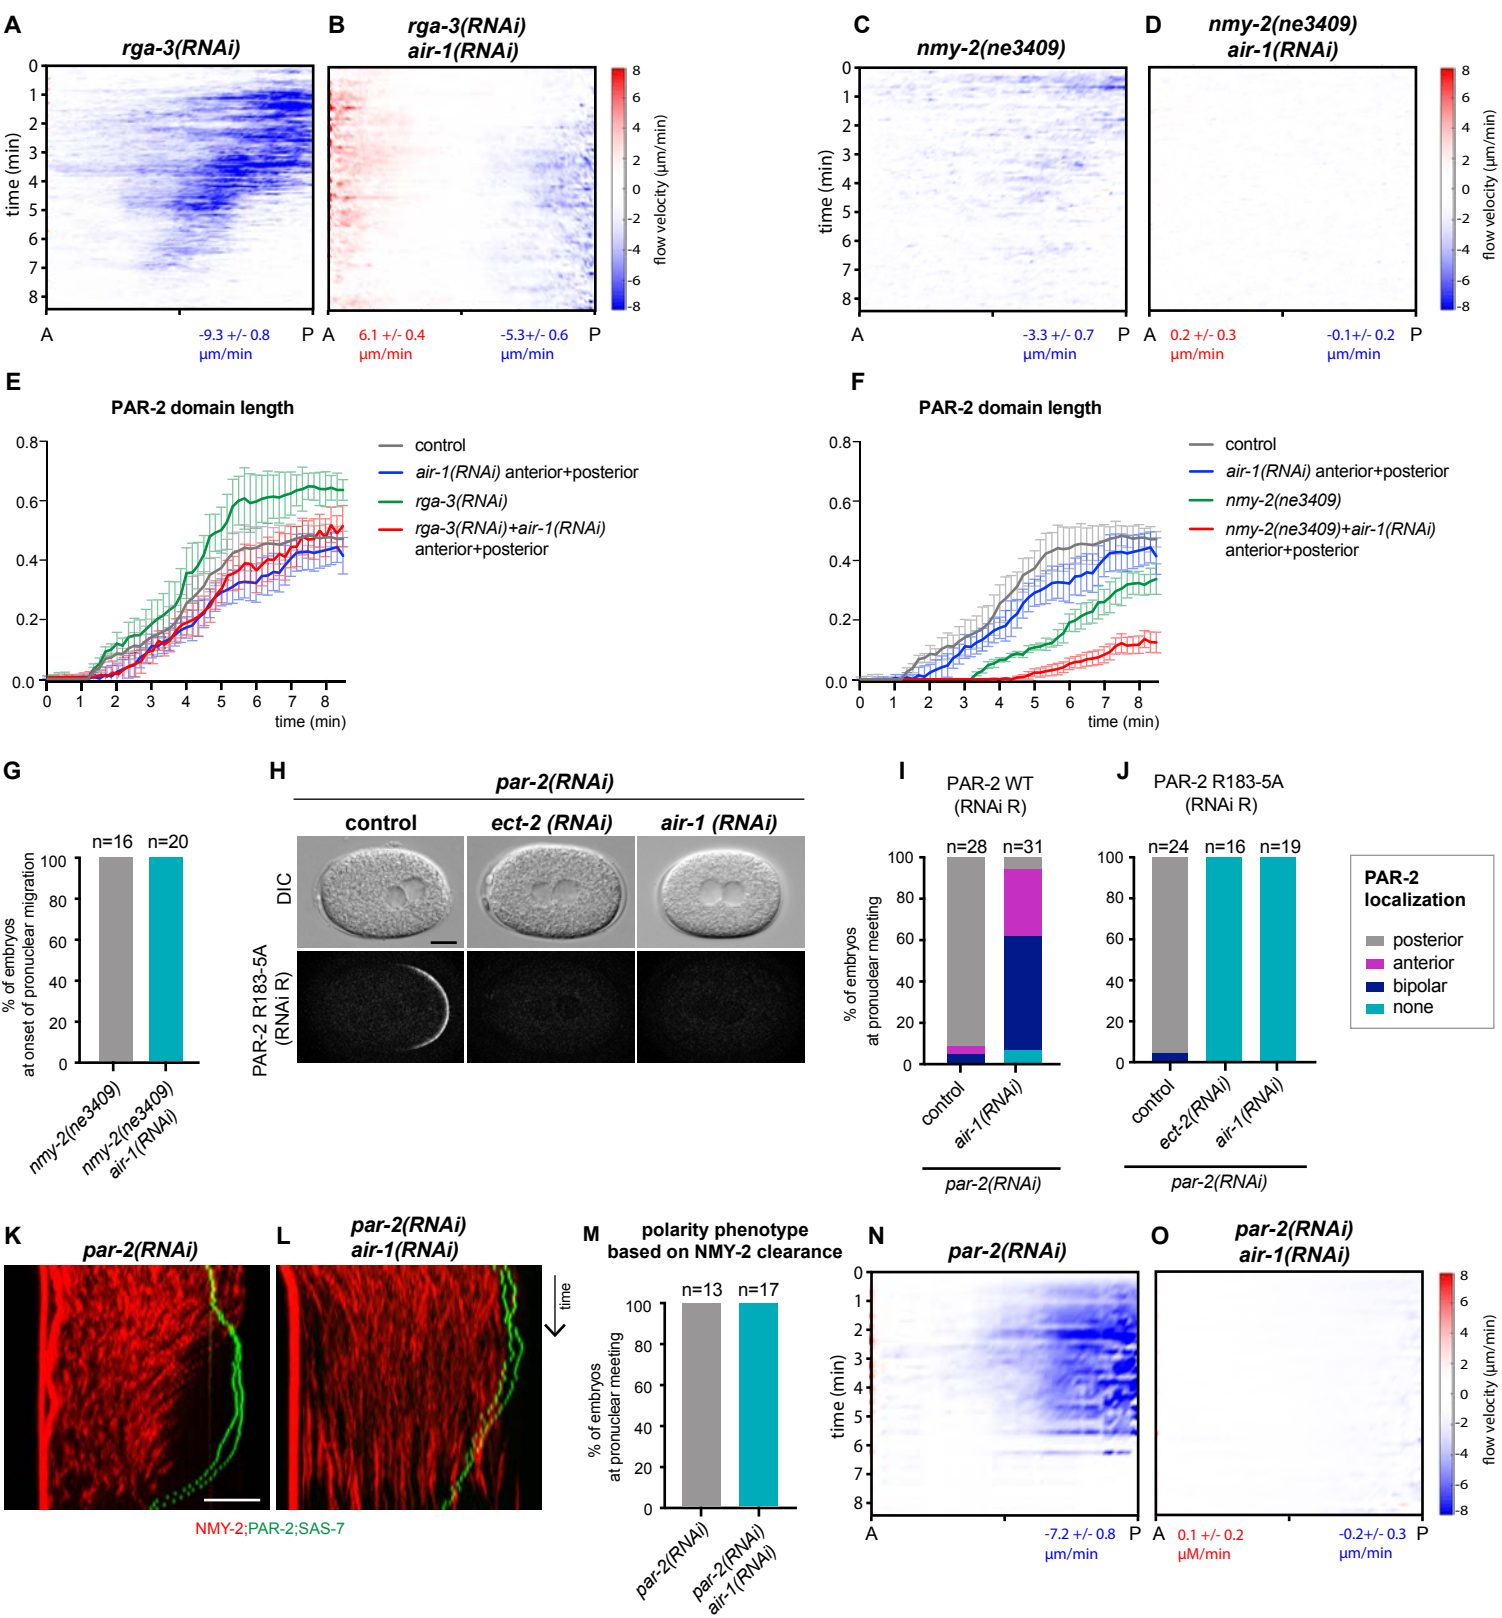

Supplement: supp [file elife-44552-supp-v1.zip › elife_poa_e44552_Figure_2_figure_supplement_1.pdf]

# Figure 1- Figure Supplement 2

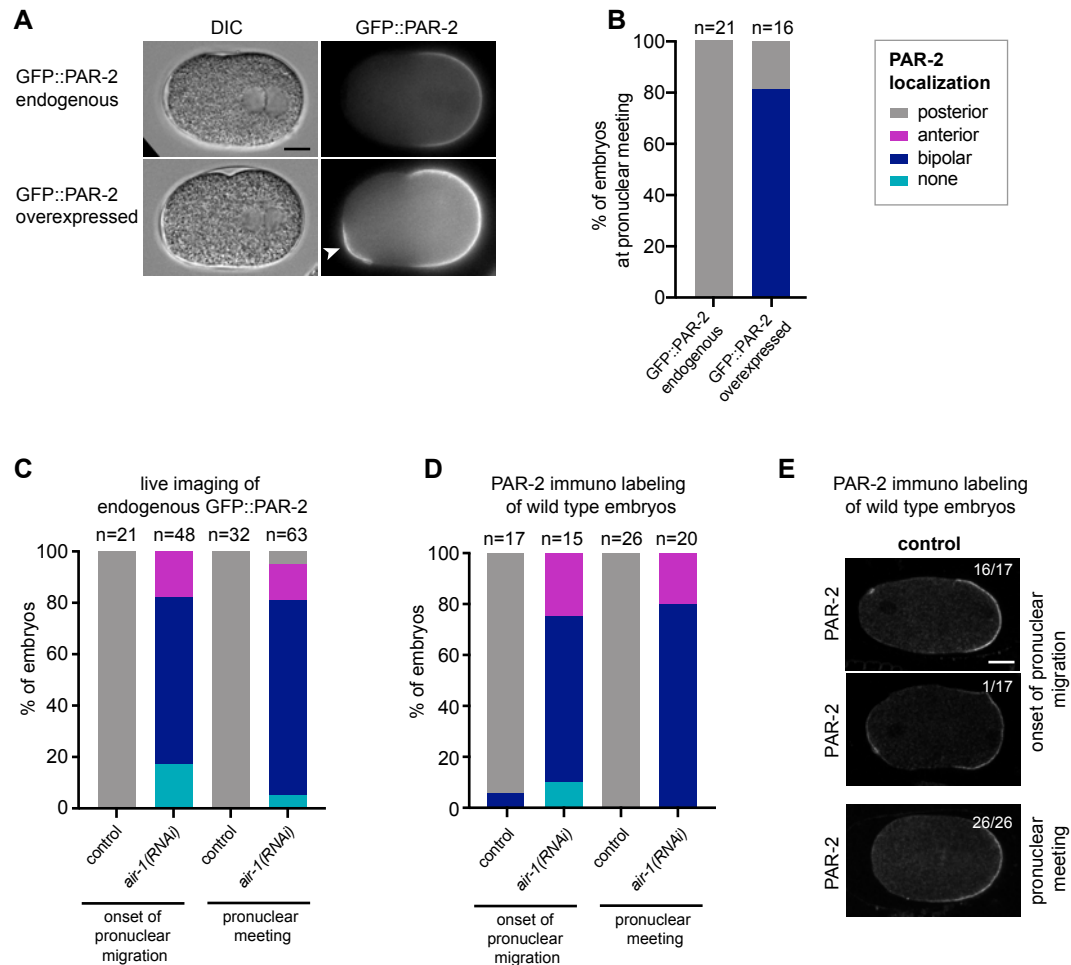

Supplement: supp [file elife-44552-supp-v1.zip › elife_poa_e44552_Figure_1_figure_supplement_2.pdf]

Figure 3- Figure Supplement 4

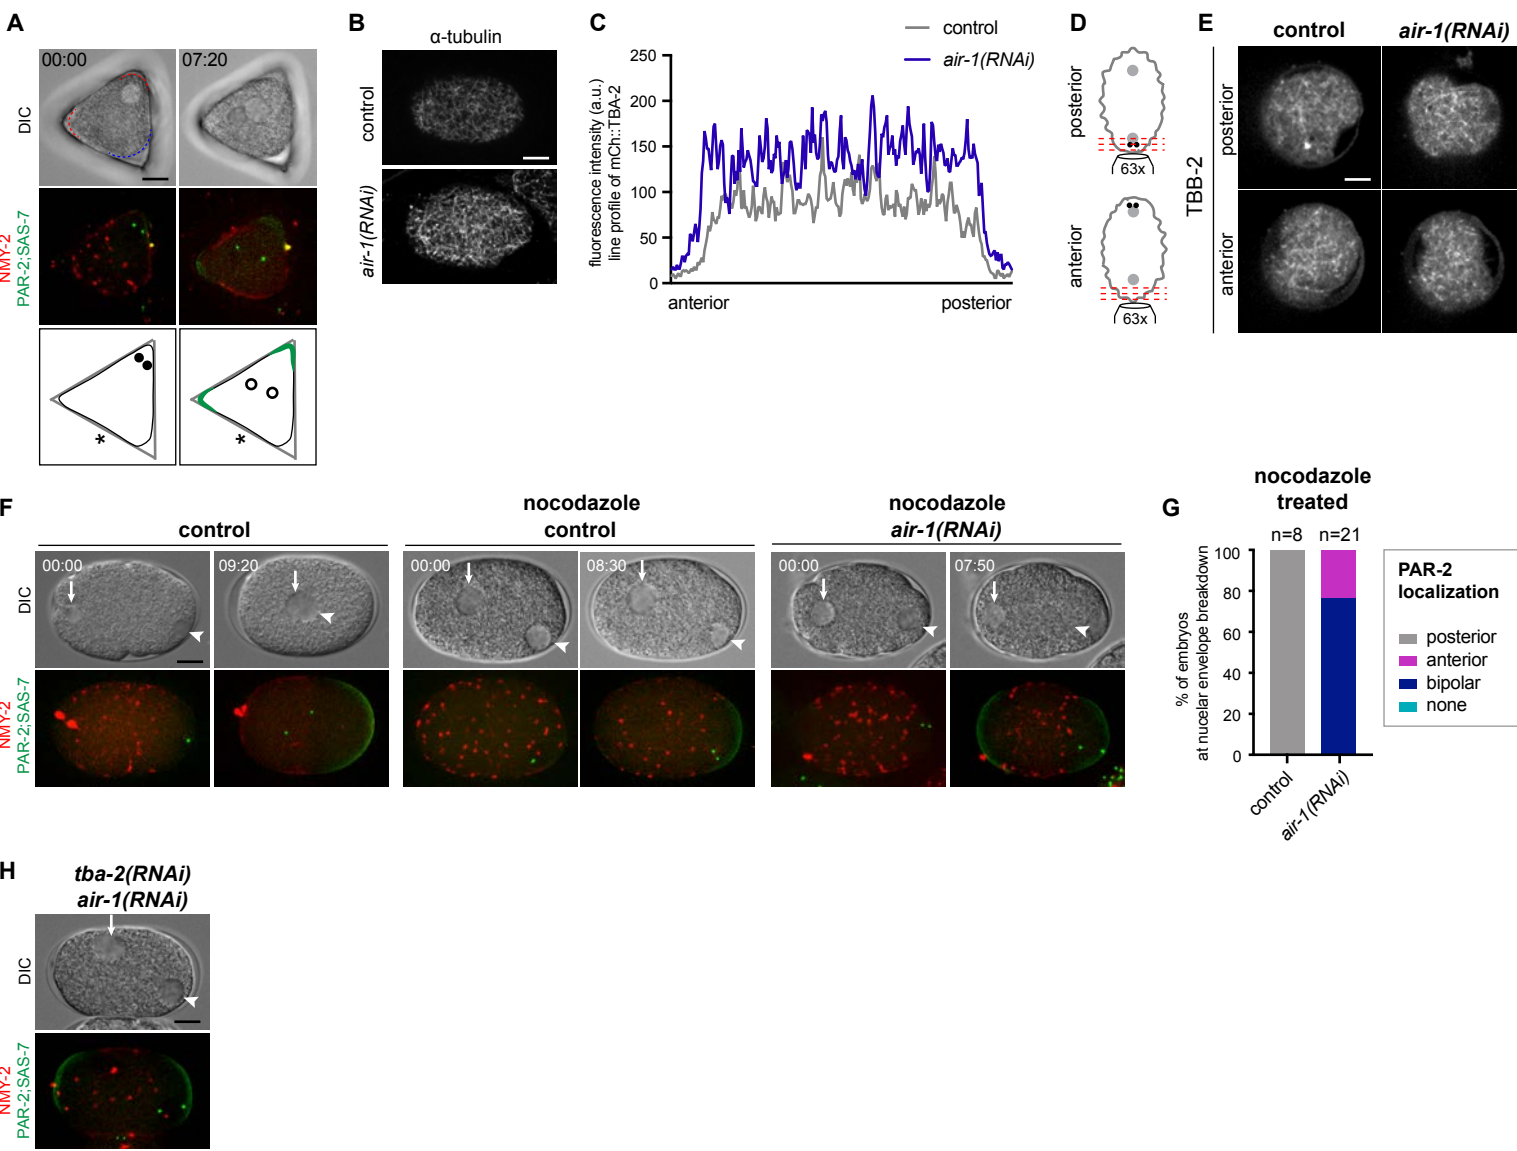

Supplement: supp [file elife-44552-supp-v1.zip › elife_poa_e44552_Figure_3_figure_supplement_1.pdf]

# Figure 1- Figure Supplement 1

**A**

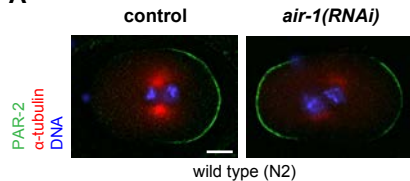

**B**

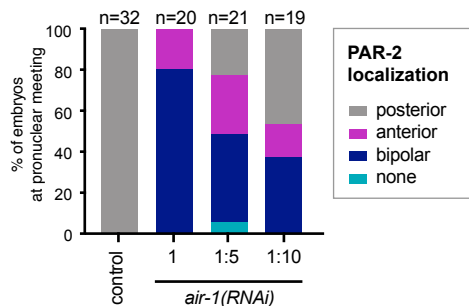

**C**

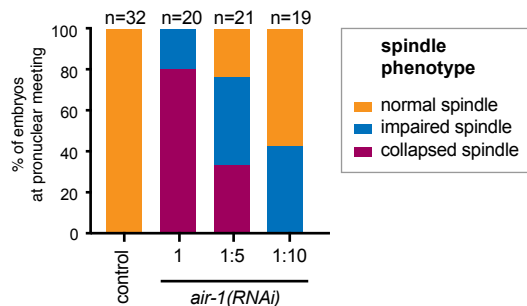

**D**

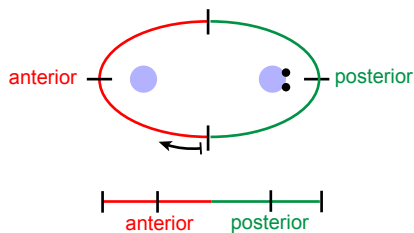

**E**

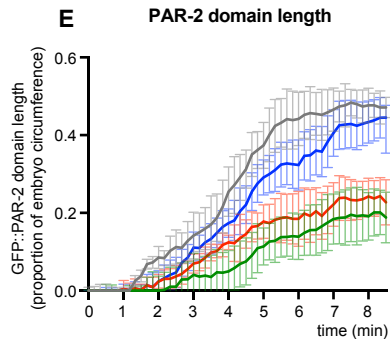

**F**

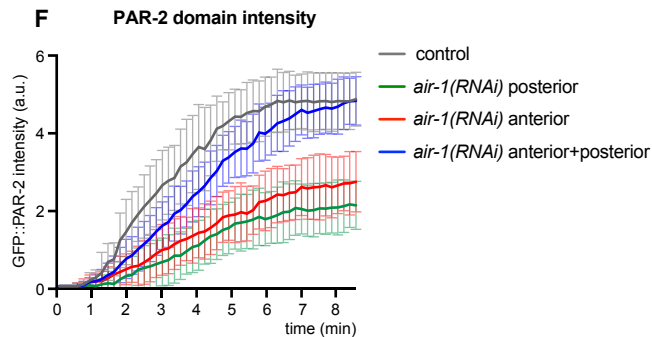

Supplement: supp [file elife-44552-supp-v1.zip › elife_poa_e44552_Figure_1_figure_supplement_1.pdf]

# Figure 5- Figure Supplement 6

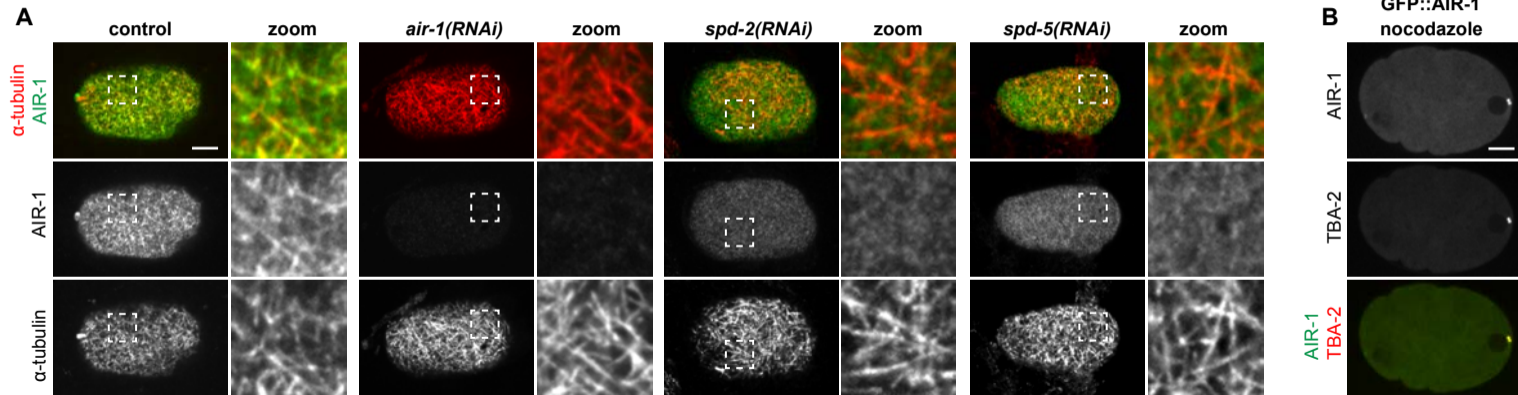

Supplement: supp [file elife-44552-supp-v1.zip › elife_poa_e44552_Figure_5_figure_supplement_1.pdf]

# Figure 4- Figure Supplement 5

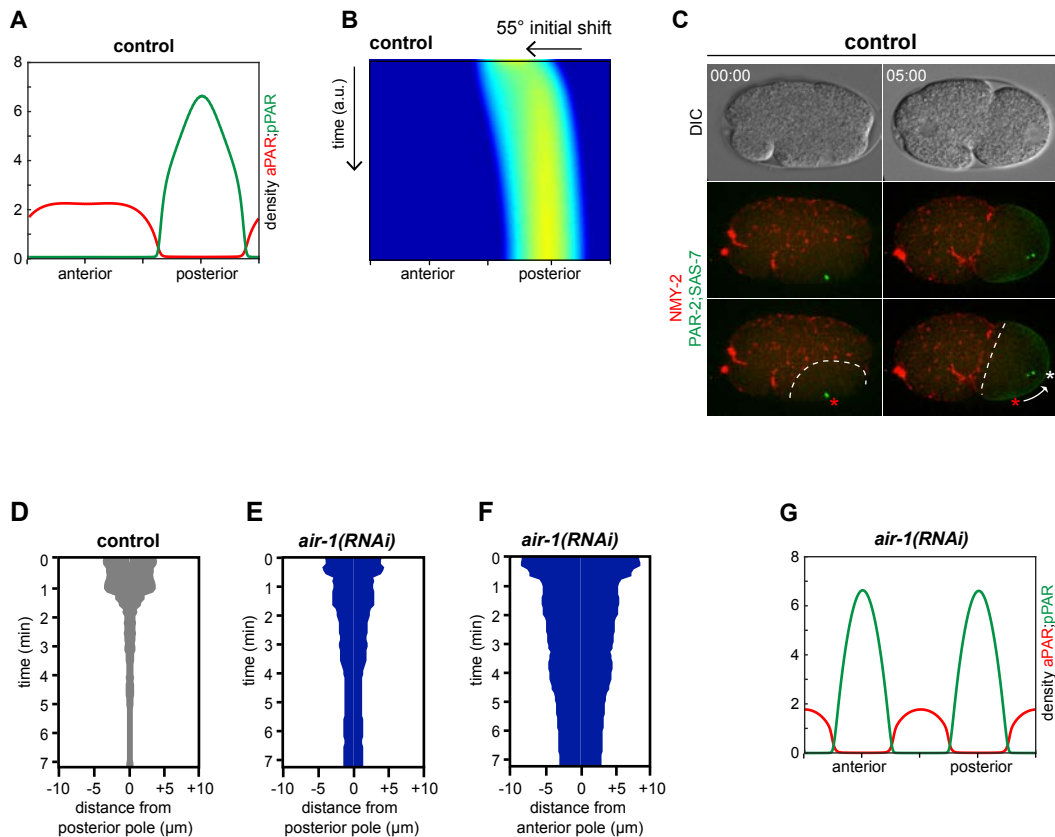

Supplement: supp [file elife-44552-supp-v1.zip › elife_poa_e44552_Figure_4_figure_supplement_1.pdf]
